# Supplementary material
Source: PubMed Central journal article supplement (PMC5766962)
Supplement: 10.1074_M117.794453_jbc.M117.794453-1.pdf [file 10.1074_M117.794453_jbc.M117.794453-1.pdf]

## Supplemental Table 1:

Statistical analysis for all steady-state kinetic parameters.

|                   | (i) SERCA | (i) SERCA-PLN                             | (ii) SERCA                               | (ii) SERCA-PLN                       | (iii) SERCA                              | (iii) SERCA + PLN                         | (iv) SERCA                           | (iv) SERCA + PLN                          |
|-------------------|-----------|-------------------------------------------|------------------------------------------|--------------------------------------|------------------------------------------|-------------------------------------------|--------------------------------------|-------------------------------------------|
| (i) SERCA         |           | KCa p<0.001<br>Vmax p<0.001<br>nH p<0.013 | KCa p<0.01<br>Vmax p<0.001<br>nH NS      | KCa p<0.001<br>Vmax p<0.03<br>nH NS  | KCa NS<br>Vmax p<0.005<br>nH NS          | KCa p<0.001<br>Vmax p<0.001<br>nH NS      | KCa NS<br>Vmax p<0.006<br>nH NS      | KCa p<0.008<br>Vmax p<0.001<br>nH p<0.011 |
| (i) SERCA + PLN   |           |                                           | KCa p<0.001<br>Vmax p<0.01<br>nH p<0.016 | KCa NS<br>Vmax p<0.001<br>nH p<0.002 | KCa p<0.001<br>Vmax p<0.001<br>nH NS     | KCa NS<br>Vmax p<0.001<br>nH p<0.04       | KCa p<0.001<br>Vmax p<0.001<br>nH NS | KCa p<0.001<br>Vmax p<0.001<br>nH p<0.039 |
| (ii) SERCA        |           |                                           |                                          | KCa p<0.001<br>Vmax p<0.001<br>nH NS | KCa p<0.01<br>Vmax p<0.001<br>nH p<0.094 | KCa p<0.001<br>Vmax p<0.001<br>nH NS      | KCa p<0.01<br>Vmax p<0.001<br>nH NS  | KCa p<0.001<br>Vmax p<0.01<br>nH p<0.001  |
| (ii) SERCA + PLN  |           |                                           |                                          |                                      | KCa p<0.001<br>Vmax NS<br>nH NS          | KCa NS<br>Vmax p<0.001<br>nH NS           | KCa p<0.001<br>Vmax NS<br>nH NS      | KCa p<0.006<br>Vmax p<0.01<br>nH p<0.004  |
| (iii) SERCA       |           |                                           |                                          |                                      |                                          | KCa p<0.001<br>Vmax p<0.001<br>nH p<0.062 | KCa NS<br>Vmax NS<br>nH NS           | KCa p<0.001<br>Vmax p<0.01<br>nH p<0.09   |
| (iii) SERCA + PLN |           |                                           |                                          |                                      |                                          |                                           | KCa p<0.001<br>Vmax p<0.001<br>nH NS | KCa p<0.002<br>Vmax p<0.001<br>nH p<0.001 |
| (iv) SERCA        |           |                                           |                                          |                                      |                                          |                                           |                                      | KCa p<0.001<br>Vmax p<0.01<br>nH p<0.015  |

Statistical analysis for all pre-steady state kinetic parameters.

|                   | (i) SERCA | (i) SERCA-PLN        | (ii) SERCA           | (ii) SERCA-PLN       | (iii) SERCA          | (iii) SERCA + PLN         | (iv) SERCA <sup>a</sup> | (iv) SERCA-PLN <sup>a</sup> |
|-------------------|-----------|----------------------|----------------------|----------------------|----------------------|---------------------------|-------------------------|-----------------------------|
| (i) SERCA         |           | KCa p<0.076<br>nH NS | KCa NS<br>nH NS      | KCa p<0.016<br>nH NS | KCa NS<br>nH NS      | KCa p<0.001<br>nH NS      | KCa NS<br>nH NS         | KCa NS<br>nH p<0.05         |
| (i) SERCA + PLN   |           |                      | KCa p<0.001<br>nH NS | KCa NS<br>nH NS      | KCa p<0.022<br>nH NS | KCa p<0.014<br>nH p<0.025 | KCa p<0.001<br>nH NS    | KCa p<0.05<br>nH p<0.05     |
| (ii) SERCA        |           |                      |                      | KCa p<0.006<br>nH NS | KCa NS<br>nH NS      | KCa p<0.001<br>nH p<0.045 | KCa NS<br>nH NS         | KCa p<0.033<br>nH p<0.01    |
| (ii) SERCA + PLN  |           |                      |                      |                      | KCa p<0.016<br>nH NS | KCa p<0.001<br>nH p<0.092 | KCa p<0.001<br>nH NS    | KCa NS<br>nH p<0.036        |
| (iii) SERCA       |           |                      |                      |                      |                      | KCa p<0.001<br>nH NS      | KCa NS<br>nH NS         | KCa NS<br>nH p<0.058        |
| (iii) SERCA + PLN |           |                      |                      |                      |                      |                           | KCa p<0.001<br>nH NS    | KCa p<0.001<br>nH p<0.013   |

<sup>a</sup> The steady-state condition (iv) was also compared to all pre-steady state conditions.
